# Supplementary material for: A strategy for obtaining isostructurality despite structural diversity in coordination compounds
Source: Royal Society of Chemistry journal article supplement (doi:10.1039/d3ce01106b), 2023-12-01
Supplement: d3ce01106b1.pdf [file d3ce01106b1.pdf]

## Supporting Information

### A strategy for obtaining isostructurality in spite of structural diversity in coordination compounds

Vahid Amani,<sup>1\*</sup> Maryam Esmaceli,<sup>2</sup> Fataneh Norouzi,<sup>2</sup> Hamid Reza Khavasi<sup>2\*</sup>

<sup>1</sup>*Department of Chemistry Education, Farhangian University, P.O. Box 14665-889, Tehran, Iran*

<sup>2</sup>*Department of Inorganic Chemistry and Catalysis, Shahid Beheshti University, General Campus, Evin, Tehran 1983963113, Iran*

E-mail: (V. Amani) [v.amani@cfu.ac.ir](mailto:v.amani@cfu.ac.ir), [v\\_amani2002@yahoo.com](mailto:v_amani2002@yahoo.com)

|                                                                                                          |        |
|----------------------------------------------------------------------------------------------------------|--------|
| Figure S1. The ORTEP diagram of coordination compound in <b>A</b> , <b>B</b> and <b>C</b> series.        | page 2 |
| Figure S2. Fragments selected for calculation of dimer binding energies in <b>A</b> and <b>B</b> series. | page 3 |
| Table S1. Crystallographic data                                                                          | Page 4 |
| Table S2. Geometrical parameters of hydrogen bonding in <b>A</b> , <b>B</b> and <b>C</b> series.         | page 5 |
| Table S3. Geometrical parameters around central metal in <b>B</b> and <b>C</b> series.                   | page 6 |
| References                                                                                               | Page 6 |

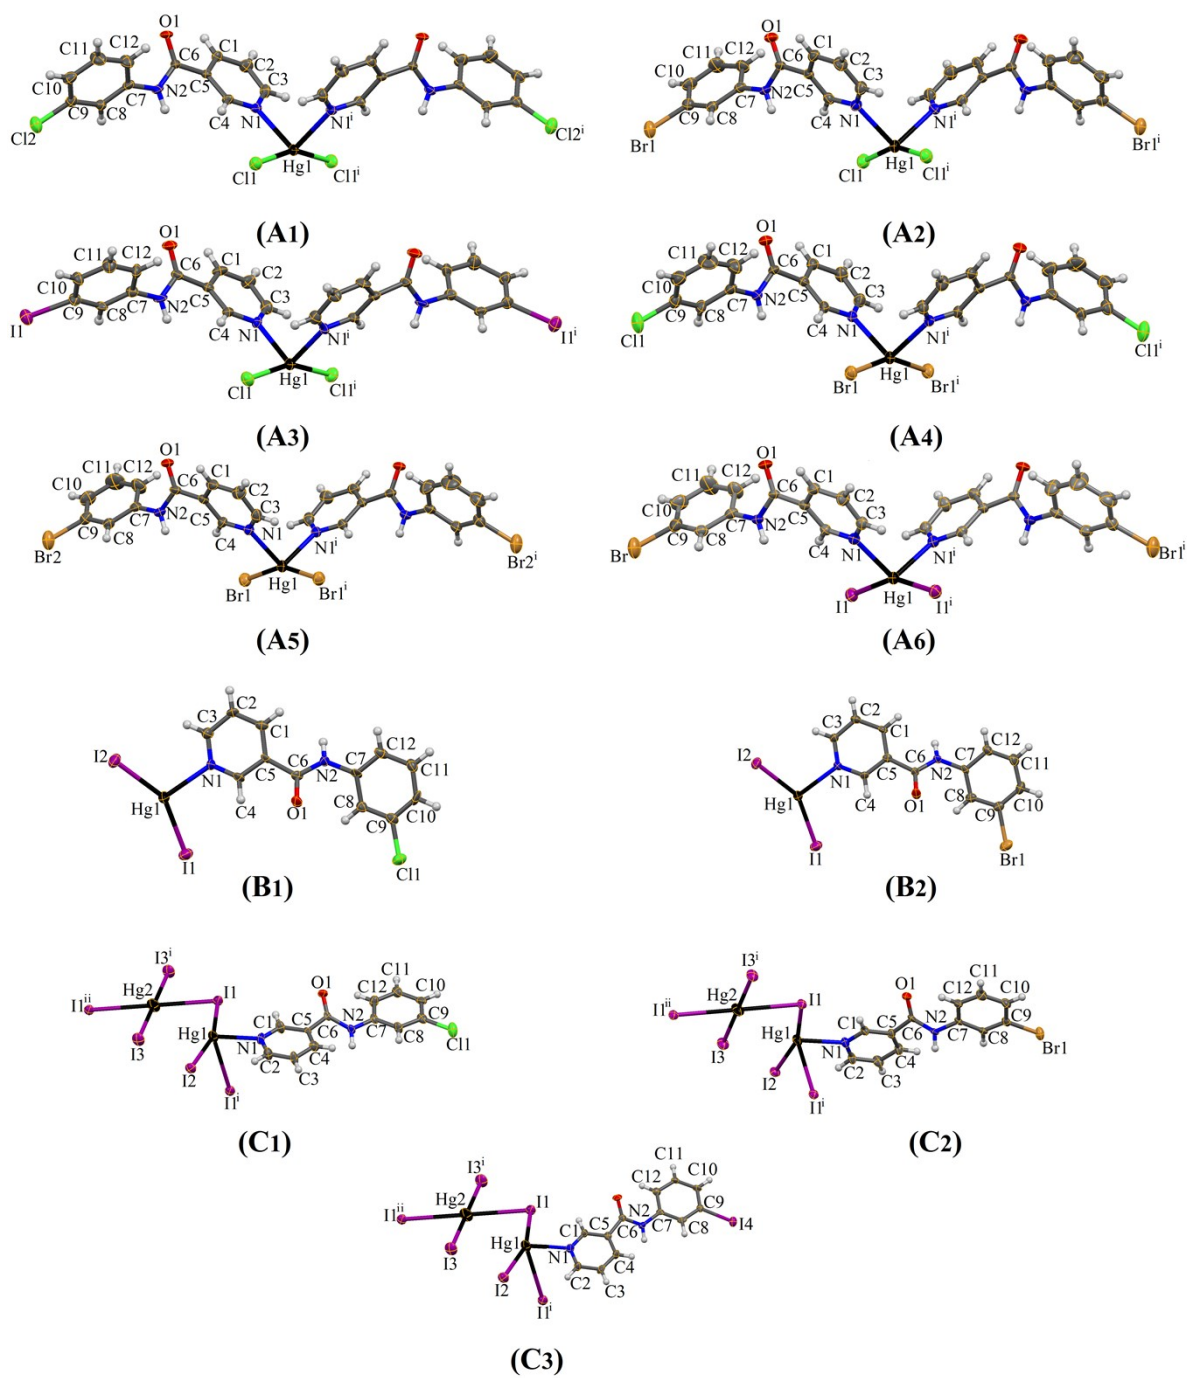

**Figure S1.** The ORTEP diagram of coordination compounds **A**, **B** and **C** series, showing coordination geometry around central metal. Ellipsoids are drawn at 30% probability level.

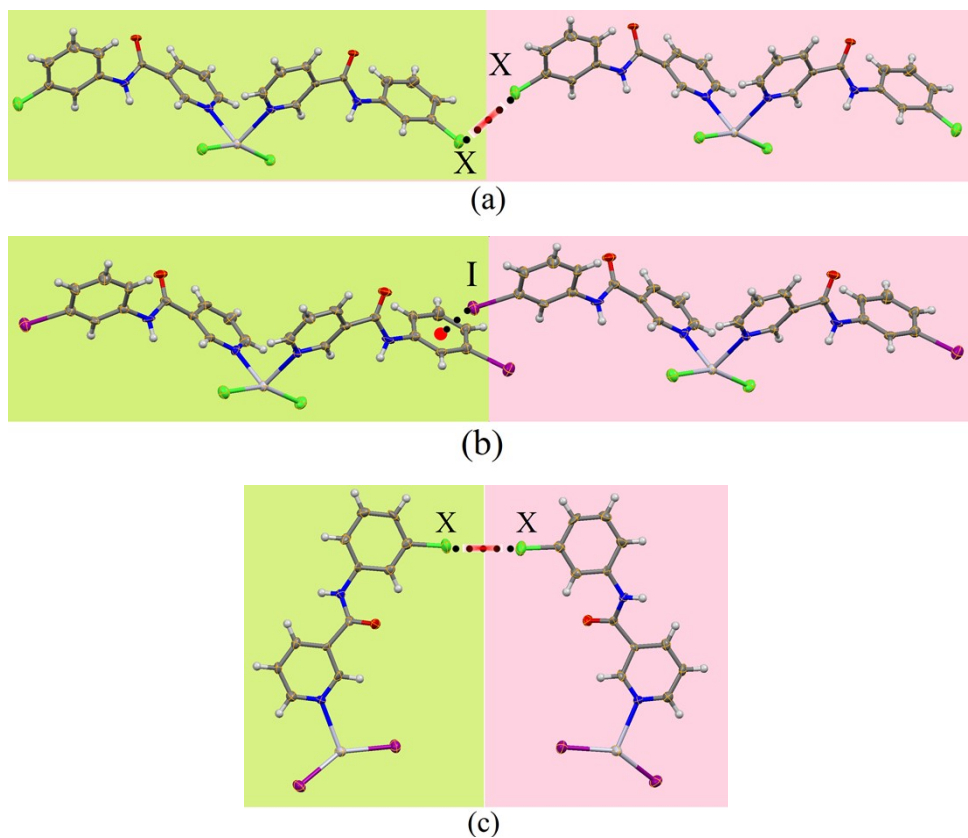

**Figure S2.** Selected fragments for calculating energy of (a) X...X interaction in **A**<sub>1</sub>, **A**<sub>2</sub>, **A**<sub>4</sub>, **A**<sub>5</sub> and **A**<sub>6</sub>, (b) Type I X...π interaction in **A**<sub>3</sub> and (c) Type I X...X interaction in **B**<sub>1</sub> and **B**<sub>2</sub>.

**Table S1.** Structural data and refinement parameters for **A**, **B** and **C** series.

|                                                                          | <b>A<sub>1</sub></b>                                                            | <b>A<sub>2</sub></b>                                                                            | <b>A<sub>3</sub></b>                                                                                         | <b>A<sub>4</sub></b>                                                                                         | <b>A<sub>5</sub></b>                                                                         | <b>A<sub>6</sub><sup>i</sup></b>                                                               |
|--------------------------------------------------------------------------|---------------------------------------------------------------------------------|-------------------------------------------------------------------------------------------------|--------------------------------------------------------------------------------------------------------------|--------------------------------------------------------------------------------------------------------------|----------------------------------------------------------------------------------------------|------------------------------------------------------------------------------------------------|
| formula                                                                  | C <sub>24</sub> H <sub>18</sub> Cl <sub>4</sub> HgN <sub>4</sub> O <sub>2</sub> | C <sub>24</sub> H <sub>18</sub> Br <sub>2</sub> Cl <sub>2</sub> HgN <sub>4</sub> O <sub>2</sub> | C <sub>24</sub> H <sub>18</sub> Cl <sub>2</sub> HgI <sub>2</sub> N <sub>4</sub> O <sub>2</sub>               | C <sub>24</sub> H <sub>18</sub> Br <sub>2</sub> Cl <sub>2</sub> HgN <sub>4</sub> O <sub>2</sub>              | C <sub>24</sub> H <sub>18</sub> Br <sub>4</sub> HgN <sub>4</sub> O <sub>2</sub>              | C <sub>24</sub> H <sub>18</sub> Br <sub>2</sub> HgI <sub>2</sub> N <sub>4</sub> O <sub>2</sub> |
| fw                                                                       | 736.81                                                                          | 825.71                                                                                          | 919.71                                                                                                       | 825.71                                                                                                       | 914.61                                                                                       | 1008.61                                                                                        |
| crystal system                                                           | monoclinic                                                                      | monoclinic                                                                                      | monoclinic                                                                                                   | monoclinic                                                                                                   | monoclinic                                                                                   | monoclinic                                                                                     |
| space group                                                              | <i>C2/c</i>                                                                     | <i>C2/c</i>                                                                                     | <i>C2/c</i>                                                                                                  | <i>C2/c</i>                                                                                                  | <i>C2/c</i>                                                                                  | <i>C2/c</i>                                                                                    |
| <i>a</i> /Å                                                              | 22.366(2)                                                                       | 22.680(2)                                                                                       | 38.520(7)                                                                                                    | 23.266(3)                                                                                                    | 23.569(3)                                                                                    | 24.3489(18)                                                                                    |
| <i>b</i> /Å                                                              | 4.9665(5)                                                                       | 4.9699(3)                                                                                       | 4.8018(8)                                                                                                    | 4.9212(4)                                                                                                    | 4.9189(4)                                                                                    | 4.9200(6)                                                                                      |
| <i>c</i> /Å                                                              | 27.267(3)                                                                       | 27.573(3)                                                                                       | 14.841(2)                                                                                                    | 27.288(3)                                                                                                    | 27.722(3)                                                                                    | 28.395(2)                                                                                      |
| $\beta$ /°                                                               | 124.115(7)                                                                      | 123.819(7)                                                                                      | 100.118(13)                                                                                                  | 124.251(8)                                                                                                   | 124.465(7)                                                                                   | 125.751(4)                                                                                     |
| <i>V</i> /Å <sup>3</sup>                                                 | 2507.6(4)                                                                       | 2582.1(4)                                                                                       | 2702.4(8)                                                                                                    | 2582.5(5)                                                                                                    | 2649.8(5)                                                                                    | 2760.6(4)                                                                                      |
| <i>D</i> <sub>calc</sub> /Mg.m <sup>-3</sup>                             | 1.952                                                                           | 2.124                                                                                           | 2.261                                                                                                        | 2.124                                                                                                        | 2.293                                                                                        | 2.427                                                                                          |
| <i>Z</i>                                                                 | 4                                                                               | 4                                                                                               | 4                                                                                                            | 4                                                                                                            | 4                                                                                            | 4                                                                                              |
| $\mu$ (mm <sup>-1</sup> )                                                | 6.595                                                                           | 9.293                                                                                           | 17.266                                                                                                       | 9.291                                                                                                        | 11.870                                                                                       | 10.735                                                                                         |
| <i>F</i> (000)                                                           | 1416                                                                            | 1560                                                                                            | 1704                                                                                                         | 1560                                                                                                         | 1704                                                                                         | 1848                                                                                           |
| 2 $\theta$ (°)                                                           | 58.54                                                                           | 54                                                                                              | 58.52                                                                                                        | 58.60                                                                                                        | 58.42                                                                                        | 52                                                                                             |
| <i>R</i> (int)                                                           | 0.1221                                                                          | 0.0895                                                                                          | 0.0945                                                                                                       | 0.0984                                                                                                       | 0.1032                                                                                       | 0.1053                                                                                         |
| GOOF                                                                     | 1.042                                                                           | 1.004                                                                                           | 0.909                                                                                                        | 0.971                                                                                                        | 1.011                                                                                        | 0.885                                                                                          |
| <i>R</i> <sub>1</sub> <sup>a</sup> ( <i>I</i> >2 $\sigma$ ( <i>I</i> ))  | 0.0697                                                                          | 0.0763                                                                                          | 0.0719                                                                                                       | 0.0701                                                                                                       | 0.0705                                                                                       | 0.0489                                                                                         |
| <i>wR</i> <sub>2</sub> <sup>b</sup> ( <i>I</i> >2 $\sigma$ ( <i>I</i> )) | 0.1615                                                                          | 0.1102                                                                                          | 0.1196                                                                                                       | 0.1680                                                                                                       | 0.1562                                                                                       | 0.1203                                                                                         |
| CCDC No.                                                                 | 1016912                                                                         | 1016668                                                                                         | 1016669                                                                                                      | 1016675                                                                                                      | 1016674                                                                                      | 991771                                                                                         |
|                                                                          | <b>B<sub>1</sub></b>                                                            | <b>B<sub>2</sub><sup>i</sup></b>                                                                | <b>C<sub>1</sub></b>                                                                                         | <b>C<sub>2</sub></b>                                                                                         | <b>C<sub>3</sub></b>                                                                         |                                                                                                |
| formula                                                                  | C <sub>12</sub> H <sub>9</sub> ClHgL <sub>2</sub> N <sub>2</sub> O              | C <sub>12</sub> H <sub>9</sub> BrHgL <sub>2</sub> N <sub>2</sub> O                              | C <sub>24</sub> H <sub>18</sub> Cl <sub>2</sub> Hg <sub>3</sub> I <sub>6</sub> N <sub>4</sub> O <sub>2</sub> | C <sub>24</sub> H <sub>18</sub> Br <sub>2</sub> Hg <sub>3</sub> I <sub>6</sub> N <sub>4</sub> O <sub>2</sub> | C <sub>24</sub> H <sub>18</sub> Hg <sub>3</sub> I <sub>8</sub> N <sub>4</sub> O <sub>2</sub> |                                                                                                |
| fw                                                                       | 687.05                                                                          | 731.50                                                                                          | 1828.49                                                                                                      | 1917.39                                                                                                      | 2011.39                                                                                      |                                                                                                |
| crystal system                                                           | monoclinic                                                                      | monoclinic                                                                                      | Monoclinic                                                                                                   | monoclinic                                                                                                   | monoclinic                                                                                   |                                                                                                |
| space group                                                              | <i>C2/c</i>                                                                     | <i>C2/c</i>                                                                                     | <i>P2<sub>1</sub>/n</i>                                                                                      | <i>P2<sub>1</sub>/n</i>                                                                                      | <i>P2<sub>1</sub>/n</i>                                                                      |                                                                                                |
| <i>a</i> /Å                                                              | 25.080(6)                                                                       | 25.3903(15)                                                                                     | 4.5347(4)                                                                                                    | 4.5326(4)                                                                                                    | 4.5421(3)                                                                                    |                                                                                                |
| <i>b</i> /Å                                                              | 14.097(4)                                                                       | 14.1304(6)                                                                                      | 21.3006(12)                                                                                                  | 21.4340(12)                                                                                                  | 21.7134(19)                                                                                  |                                                                                                |
| <i>c</i> /Å                                                              | 9.200(2)                                                                        | 9.1996(6)                                                                                       | 19.0448(15)                                                                                                  | 19.1582(16)                                                                                                  | 19.3708(13)                                                                                  |                                                                                                |
| $\beta$ /°                                                               | 100.394(18)                                                                     | 99.658(5)                                                                                       | 91.533(7)                                                                                                    | 92.076(7)                                                                                                    | 92.541(6)                                                                                    |                                                                                                |
| <i>V</i> /Å <sup>3</sup>                                                 | 3199.4(13)                                                                      | 3253.8(3)                                                                                       | 1838.9(2)                                                                                                    | 1860.0(2)                                                                                                    | 1908.6(2)                                                                                    |                                                                                                |
| <i>D</i> <sub>calc</sub> /Mg.m <sup>-3</sup>                             | 2.853                                                                           | 2.987                                                                                           | 3.302                                                                                                        | 3.424                                                                                                        | 3.500                                                                                        |                                                                                                |
| <i>Z</i>                                                                 | 8                                                                               | 8                                                                                               | 2                                                                                                            | 2                                                                                                            | 2                                                                                            |                                                                                                |
| $\mu$ (mm <sup>-1</sup> )                                                | 13.641                                                                          | 15.705                                                                                          | 17.703                                                                                                       | 19.507                                                                                                       | 18.534                                                                                       |                                                                                                |
| <i>F</i> (000)                                                           | 2448                                                                            | 2592                                                                                            | 1596                                                                                                         | 1668                                                                                                         | 1740                                                                                         |                                                                                                |
| 2 $\theta$ (°)                                                           | 54                                                                              | 52                                                                                              | 58.50                                                                                                        | 58.40                                                                                                        | 58.58                                                                                        |                                                                                                |
| <i>R</i> (int)                                                           | 0.0992                                                                          | 0.0985                                                                                          | 0.0915                                                                                                       | 0.0998                                                                                                       | 0.0998                                                                                       |                                                                                                |
| GOOF                                                                     | 0.895                                                                           | 1.023                                                                                           | 0.939                                                                                                        | 1.028                                                                                                        | 0.912                                                                                        |                                                                                                |
| <i>R</i> <sub>1</sub> <sup>a</sup> ( <i>I</i> >2 $\sigma$ ( <i>I</i> ))  | 0.0861                                                                          | 0.0640                                                                                          | 0.0906                                                                                                       | 0.0528                                                                                                       | 0.0640                                                                                       |                                                                                                |
| <i>wR</i> <sub>2</sub> <sup>b</sup> ( <i>I</i> >2 $\sigma$ ( <i>I</i> )) | 0.1658                                                                          | 0.1406                                                                                          | 0.1101                                                                                                       | 0.1174                                                                                                       | 0.1055                                                                                       |                                                                                                |
| CCDC No.                                                                 | 1016676                                                                         | 991770                                                                                          | 1016677                                                                                                      | 991767                                                                                                       | 1016672                                                                                      |                                                                                                |

<sup>a</sup> $R_1 = \sum ||F_o| - |F_c|| / \sum |F_o|$ . <sup>b</sup> $wR_2 = [\sum (w(F_o^2 - F_c^2)^2) / \sum w(F_o^2)^2]^{1/2}$ . <sup>i</sup> From reference [1].

**Table S2.** Geometrical parameters of hydrogen bonding in complexes A-C series.

| Complexes      | D-H...A           | d(D-H)/Å | d(H...A)/Å | d(D...A)/Å | <D-H...A/>° | Sym. Code           |
|----------------|-------------------|----------|------------|------------|-------------|---------------------|
| A <sub>1</sub> | N2-H2A ...O1= C6  | 0.860(8) | 2.071(7)   | 2.89(1)    | 160.2(7)    | x,-1+y,z            |
| A <sub>2</sub> | N2-H2A ...O1= C6  | 0.86(1)  | 2.069(1)   | 2.90(1)    | 161.5(9)    | x, 1+y,z            |
| A <sub>3</sub> | N2-H2A ...O1= C6  | 0.860(9) | 2.087(9)   | 2.88(1)    | 153.2(7)    | x,-1+y,z            |
|                | C2-H2... I1-Hg1   | 0.93(2)  | 2.869(3)   | 3.48(1)    | 124.7(9)    | x,2-y,-1/2+z        |
| A <sub>4</sub> | N2-H2A ...O1= C6  | 0.860(9) | 2.86(1)    | 2.016(9)   | 167.8(8)    | x,-1+y,z            |
| A <sub>5</sub> | N2-H2A ...O1= C6  | 0.86(1)  | 2.039(8)   | 2.87(1)    | 163.3(8)    | x,1+y,z             |
| A <sub>6</sub> | N2-H2A ...O1= C6  | 0.860(8) | 2.048(7)   | 2.88(1)    | 161.1(6)    | x,1+y,z             |
| B <sub>1</sub> | N2-H2A ...O1= C6  | 0.86(1)  | 2.08(1)    | 2.88(2)    | 155(1)      | x,1-y,-1/2+z        |
|                | C12-H12 ...O1= C6 | 0.93(2)  | 2.59(1)    | 3.22(2)    | 126(1)      | x,1-y,-1/2+z        |
|                | C2-H2...I2-Hg     | 0.93(1)  | 3.107(2)   | 3.91(2)    | 146(1)      | 1/2-x,1/2+y,1.5-z   |
| B <sub>2</sub> | N2-H2A ...O1= C6  | 0.859(7) | 2.118(8)   | 2.91(1)    | 152.5(6)    | x,1-y,1/2+z         |
|                | C12-H12 ...O1= C6 | 0.93(1)  | 2.540(8)   | 3.19(1)    | 127.0(8)    | x,1-y,1/2+z         |
|                | C2-H2...I2-Hg     | 0.93(1)  | 3.139(9)   | 3.92(1)    | 143.1(7)    | 1/2-x,1/2+y,1/2-z   |
| C <sub>1</sub> | N2-H2A ...O1= C6  | 0.86(1)  | 2.15(1)    | 2.84(2)    | 138(1)      | 1+x,y,z             |
|                | C10-H10... I1-Hg1 | 0.93(2)  | 3.225(1)   | 4.05(2)    | 149(1)      | 2-x,-y,1-z          |
|                | C4-H4... I2-Hg1   | 0.93(2)  | 3.259(1)   | 4.11(2)    | 154(1)      | 1/2+x,1/2-y,1/2+z   |
| C <sub>2</sub> | N2-H2A ...O1= C6  | 0.860(7) | 2.115(7)   | 2.84(1)    | 142.1(6)    | 1+x,y,z             |
|                | C11-H11 ...O1= C6 | 0.93(1)  | 2.746(8)   | 3.55(1)    | 145.6(8)    | -x,-y,1-z           |
|                | C10-H10... I1-Hg1 | 0.93(1)  | 3.239(7)   | 4.07(1)    | 149.0(6)    | -x,-y,1-z           |
|                | C4-H4... I2-Hg1   | 0.93(1)  | 3.242(8)   | 4.11(1)    | 155.8(7)    | -1/2+x,1/2-y,-1/2+z |
| C <sub>3</sub> | N2-H2A ...O1= C6  | 0.862(9) | 2.15(1)    | 2.85(1)    | 137.9(7)    | 1+x,y,z             |
|                | C11-H11 ...O1= C6 | 0.93(1)  | 2.63(1)    | 3.45(2)    | 147.3(9)    | 2-x,-y,1-z          |
|                | C10-H10... I1-Hg1 | 0.93(2)  | 3.321(1)   | 4.17(1)    | 152.2(9)    | 2-x,-y,1-z          |
|                | C4-H4... I2-Hg1   | 0.93(2)  | 3.286(1)   | 4.16(1)    | 157.8(9)    | -1/2+x,1/2-y,-1/2+z |

**Table S3.** Geometrical parameters of central atom in B- and C-series complexes.

|               |           | Complex                                                                                               |                        |                                                                                                       |                        |                                                                                                      |                        | Sym. Code                 |
|---------------|-----------|-------------------------------------------------------------------------------------------------------|------------------------|-------------------------------------------------------------------------------------------------------|------------------------|------------------------------------------------------------------------------------------------------|------------------------|---------------------------|
|               |           | [Hg <sub>3</sub> I <sub>6</sub> (L <sup>3-Cl-nic</sup> ) <sub>2</sub> ] <sub>n</sub> , C <sub>1</sub> |                        | [Hg <sub>3</sub> I <sub>6</sub> (L <sup>3-Br-nic</sup> ) <sub>2</sub> ] <sub>n</sub> , C <sub>2</sub> |                        | [Hg <sub>3</sub> I <sub>6</sub> (L <sup>3-I-nic</sup> ) <sub>2</sub> ] <sub>n</sub> , C <sub>3</sub> |                        |                           |
|               |           | Hg1                                                                                                   | Hg2                    | Hg1                                                                                                   | Hg2                    | Hg1                                                                                                  | Hg2                    |                           |
| Bond distance | Hg-X1     | 2.633(2)                                                                                              | 3.499(2)               | 2.6339(8)                                                                                             | 3.5160(6)              | 2.639(1)                                                                                             | 3.576(1)               | -                         |
|               | Hg-X2     | 2.621(2)                                                                                              | -                      | 2.6230(8)                                                                                             | -                      | 2.620(1)                                                                                             | -                      | -                         |
|               | Hg-X3     | -                                                                                                     | 2.592(2)               | -                                                                                                     | 2.5897(9)              | -                                                                                                    | 2.588(1)               | -                         |
|               | Hg-X1     | 3.430(2) <sup>b</sup>                                                                                 | -                      | 3.4264(8) <sup>a</sup>                                                                                | -                      | 3.420(1) <sup>b</sup>                                                                                | -                      | a=1+x,y,z , b=-1+x,y,z    |
|               | Hg-X3     | -                                                                                                     | 3.598(2) <sup>b</sup>  | -                                                                                                     | 3.5976(9) <sup>a</sup> | -                                                                                                    | 3.615(1) <sup>b</sup>  | a=-1+x,y,z , b=1+x,y,z    |
|               | Hg-N1     | 2.45(2)                                                                                               | -                      | 2.488(8)                                                                                              | -                      | 2.50(1)                                                                                              | -                      | -                         |
| Bond angle    | X1-Hg-X2  | 159.98(6)                                                                                             | -                      | 159.75(3)                                                                                             | -                      | 159.29(4)                                                                                            | -                      | -                         |
|               | X1-Hg-X3  | -                                                                                                     | 91.99(5)               | -                                                                                                     | 91.07(2)               | -                                                                                                    | 91.10(3)               | -                         |
|               | N1-Hg-X1  | 97.7(4)                                                                                               | -                      | 90.34(2)                                                                                              | -                      | 98.6(3)                                                                                              | -                      | -                         |
|               | N1-Hg-X2  | 102.0(4)                                                                                              | -                      | 100.8(2)                                                                                              | -                      | 101.5(3)                                                                                             | -                      | -                         |
|               | N1-Hg-X1  | 82.7(4) <sup>b</sup>                                                                                  | -                      | 83.9(2) <sup>a</sup>                                                                                  | -                      | 83.7(3) <sup>b</sup>                                                                                 | -                      | a=1+x,y,z , b=-1+x,y,z    |
|               | X1-Hg-X1  | 95.92(5) <sup>b</sup>                                                                                 | -                      | 95.94(2) <sup>a</sup>                                                                                 | -                      | 96.27(3) <sup>b</sup>                                                                                | -                      | a=1+x,y,z , b=-1+x,y,z    |
|               | X2-Hg-X1  | 90.19(5) <sup>b</sup>                                                                                 | -                      | 90.34(2) <sup>a</sup>                                                                                 | -                      | 90.74(3) <sup>b</sup>                                                                                | -                      | a=1+x,y,z , b=-1+x,y,z    |
|               | X1-Hg-X3  | -                                                                                                     | 88.01(5) <sup>b</sup>  | -                                                                                                     | 88.93(2) <sup>a</sup>  | -                                                                                                    | 88.90(4) <sup>b</sup>  | a=-x,-y,-z , b=2-x,-y,2-z |
|               | X1-Hg-X1  | -                                                                                                     | 180.00(3) <sup>b</sup> | -                                                                                                     | 180.00(1) <sup>a</sup> | -                                                                                                    | 180.00(2) <sup>b</sup> | a=-x,-y,-z , b=2-x,-y,2-z |
|               | X3-Hg-X3  | -                                                                                                     | 180.00(6) <sup>b</sup> | -                                                                                                     | 180.00(3) <sup>a</sup> | -                                                                                                    | 180.00(4) <sup>b</sup> | a=-x,-y,-z , b=2-x,-y,2-z |
|               |           | Complex                                                                                               |                        |                                                                                                       |                        | Sym.code                                                                                             |                        |                           |
|               |           | [HgI <sub>2</sub> (L <sup>3-Cl-nic</sup> )], B <sub>1</sub>                                           |                        | [HgI <sub>2</sub> (L <sup>3-Br-nic</sup> )], B <sub>2</sub>                                           |                        |                                                                                                      |                        |                           |
|               |           |                                                                                                       |                        |                                                                                                       |                        |                                                                                                      |                        |                           |
| Bond distance | Hg1-X1    | 2.612(2)                                                                                              |                        | 2.618(1)                                                                                              |                        | -                                                                                                    |                        |                           |
|               | Hg1-X2    | 2.634(2)                                                                                              |                        | 2.636(1)                                                                                              |                        | -                                                                                                    |                        |                           |
|               | Hg1-N1    | 2.43(1)                                                                                               |                        | 2.40(1)                                                                                               |                        | -                                                                                                    |                        |                           |
| Bond angle    | X1-Hg1-X2 | 148.43(4)                                                                                             |                        | 148.48(4)                                                                                             |                        | -                                                                                                    |                        |                           |
|               | N1-Hg1-X1 | 106.0(4)                                                                                              |                        | 107.6(2)                                                                                              |                        | -                                                                                                    |                        |                           |
|               | N1-Hg1-X2 | 104.7(4)                                                                                              |                        | 102.9(2)                                                                                              |                        | -                                                                                                    |                        |                           |

### References:

[S1] Khavasi, H. R.; Esmacili, M. *CrystEngComm* **2014**, *16*, 8479–8485.
